# Supplementary material for: Phaseolus vulgaris leaves increase short chain fatty acids (SCFA) production ameliorating early metabolic alterations
Source: Research Square preprint supplement (doi:10.21203/rs.3.rs-1551830/v1), 2022-04-21
Supplement: Supplementary file 1 [file 01622c949ed80246f2eaa1cf.docx]

**Supplementary material.**

**Abbreviations**

AC abdominal circumference

AC/TC abdominal/thoracic circumferences index

ACD acid detergent fiber

AUC area under the curve

BL bean leaves

BMI body mass index

FME Flor de Mayo Eugenia variety

GLP-1 glucagon-like peptide 1

H high-fat/high-fructose diet group

HBL high-fat/high-fructose diet +10% of dry bean leaves group

HDL-c high-density lipoprotein cholesterol

HFFD high-fat/high-fructose diet

HOMA-IR homeostatic model assessment

LDL-c low-density lipoprotein cholesterol

NDF neutral detergent fiber

Pklr pyruvate kinase gene

PV Pinto Villa variety

PYY peptide YY

RFP daytime restricted feeding protocol

S standard diet group

SBL standard diet+10% of dry bean leaves group

Scd1 stearoyl-CoA desaturase-1 gene

SCFA short-chain fatty acids

TC thoracic circumference

VLDL-c very-low-density lipoprotein cholesterol

# Materials and Methods

**Plant material.** The improved variety of bean seeds (*Phaseolus vulgaris L.*) Flor Mayo Eugenia [1], were grown in Universidad Autónoma de Querétaro, campus Amazcala. The plants were grown under irrigation conditions, without adding fertilizer, animal manure, herbicides or pesticides. Bean leaves were harvested until the plant reached the maximum canopy cover (60-70 days), coincident with flowering initiation. They were rinsed in distilled water, dried to constant weight (40 °C), grinded (2 mm) and packed in sealed bags, stored in dark containers at room temperature, until processed.

**Chemical analysis of bean leaves.** The chemical composition of dried bean leaves was analyzed according the official methods of AOAC: moisture (AOAC 930.15), ash (AOAC 942.05), protein by Kjeldahl method (AOAC 2001.11), lipids by ether extract (AOAC 920.39), crude fiber (AOAC 962.09), neutral and acid detergent fiber [2]. Carbohydrates were calculated by difference. Dietary fiber analysis was performed by enzymatic assay (Total Dietary Fiber Assay Kit, Sigma-Aldrich) [3]. Total phenols were determined in dried sample by Folin-Ciocalteu method with modifications. Gallic acid was used as standard for the calibration curve. Sample and standard solutions were read at 750 nm in UV-Vis spectrophotometer (Genesys 10S UV-Vis, Thermo Fischer Scientific, USA) [4].

**Animal model and experimental design.** For the animal model, 36 male Wistar rats were randomly divided into one of four experimental groups. 1) Standard diet (S) fed with Rodent Laboratory Chow 5001®, 2) S+10% of dry bean leaves (SBL) ,3) high fat (lard) and fructose diet (H) and 4) high-fat/high-fructosediet with 10% of dry bean leaves (HBL). Control group contained 3.4 kcal/g and high fat / fructose diets 4.4-4.6 kcal/g [5–8] are detailed in Table S1.

Animals were housed in individual cages under controlled conditions of temperature and moisture, with 12 h light/dark cycle, water and food *ad libitum* [9, 10]. Weight gain, water and food consumption were registered weekly during the 6 experimental weeks. At the last week, in fasting conditions (6-8 h) intraperitoneal glucose tolerance was evaluated with an Accu Check Active® glucometer [11]. After the 6 weeks, blood samples were collected and maintained at -80°C. Anthropometric measures were taken, including body length, abdominal circumference (AC), thoracic circumference (TC), AC/TC index, body mass index (BMI) [12].

**Biochemical markers on serum and liver tissue.** Glucose, total cholesterol, triglycerides, high-density lipoprotein cholesterol (HDL-c) and low-density lipoprotein cholesterol (LDL-c) were evaluated through enzymatic-colorimetric assays in the clinical analyzer Spin 120® with Spinreact® reagents. Insulin was determined by immunoassay (ELISA Rat insulin kit Alpco®, RRID: AB_2820242) on Molecular Devices Spectramax 250 Microplate Reader. Very-low-density lipoprotein (VLDL-c) and homeostasis model assessment of insulin resistance (HOMA-IR) were calculated [13, 14]. For hepatic triglycerides quantification, 300 mg of liver were mixed with 21 (W/V) Folch’s reagent (chloroform: methanol 2:1, V/V). Four mililiters of saline solution (0.9% NaCl) were added and mixed. The mixture was centrifuged at 2000 g for 10 min. After 24 h (25°C) of evaporation, the remaining pellet was reconstituted with saline solution and determined by enzymatic-colorimetric assay on 96 well plate at 37°C with Spinreact® reagent on Molecular Devices Spectramax 250 Microplate Reader at 505 nm [15, 16].

**Analysis of excreted total fecal fat and triglycerides.** Fresh feces were collected for 24 h and weighed. The analysis of fecal fat was performed on 400 mg of fresh feces by Folch method. Hepatic triglycerides quantification is described elsewhere [15, 16]. Once the sample was evaporated the remaining pellet was weighed [17]. For triglycerides quantification, enzymatic-colorimetric assay was performed on Molecular Devices Spectramax 250 Microplate Reader at 505 nm.

**Short chain fatty acids analysis in colon luminal content.** Colon luminal content samples stored at -80 ºC were thawed and approximately 2 g were weighed into centrifuge tubes. HPLC water was added according to the amount of sample in the tube (4 g of sample, 6 mL of water). Each tube was vortexed for 30 s. The tubes were placed in the centrifuge (Beckman Coulter) for 30 min at 4000 rpm, 4 ºC. The previously filtered contents were poured into a small amber tube. Up to 1 μL of supernatant was injected into the gas chromatograph coupled to a flame ionization detector (Agilent, 6850 series GC system) of the following conditions, helium (40 mL / s) was used as carrier gas, in the oven it was it started at a temperature of 100 ºC for 5 min, increasing by 10 ºC until reaching 250 ºC. To determine the individual SCFA (acetate, propionate, isobutyrate, butyrate, isovalerate, valeric and isocaproic) of the sample, retention times were determined using standard solutions [18].

**Statistical Analysis.** All experimental results were expressed as mean ± standard deviation (SD). Differences between the groups were analyzed by one-way ANOVA test and Duncan post-hoc. p≤0.05 was considered to be statistically significant. Data were analyzed using IBM SPSS Statistics v.25 (RRID:SCR_019096) and GraphPad Prism 8 (RRID:SCR_002798**)** for the graphics.

**Ethical approval.** All procedures performed in this research involving animals were in accordance with the ethical standards of the institution and the protocols were previously approved by the bioethics committee under the registration numbers 06FCN2019 and 77FCN2019 (Universidad Autónoma de Querétaro). During the entire research, national and international bioethical standards on animal welfare were applied. The national guideline for animal welfare was NOM-062-Z00-1999 [10] and international ARRIVE guideline.

# References

1. Acosta Gallegos JA, Jiménez Hernández Y, Sánchez García BM, et al (2010) Flor de Mayo Eugenia, new bean cultivar for irrigated and rainfall conditions in central Mexico. Revista Mexicana de Ciencias Agrícolas 5:751-757
2. Horwitz W (2000) Official methods of analysis of AOAC International, 17th ed. The Association of Official Analytical Chemists, Gaithersburg, MD, USA
3. Heredia Ortega J, Aguilera Barreyo A, Reis de Souza T, et al (2014) Fibra dietética total: métodos de determinación en pastas de oleaginosas. In: Cantó Alarcón G, Elton Puente JE (eds) Desarrollo de la investigación en la Facultad de Ciencias Naturales, Primer Edi. D.R. Facultad de Ciencias Naturales, Querétaro, México, pp 90–102
4. Dewanto V, Xianzhong W, Adom KK, Liu RH (2002) Thermal processing enhances the nutritional value of tomatoes by increasing total antioxidant activity. J. Agric. Food Chem. https://doi.org/10.1021/jf0115589
5. Nascimento AF, Sugizaki MM, Leopoldo AS, et al (2008) A hypercaloric pellet-diet cycle induces obesity and co-morbidities in wistar rats. Arq Bras Endocrinol Metab. https://doi.org/10.1590/s0004-27302008000600007
6. Zhang J, Wang O, Guo Y, et al (2016) Effect of increasing doses of linoleic and α-linolenic acids on high-fructose and high-fat diet induced metabolic syndrome in rats. J. Agric. Food Chem. https://doi.org/10.1021/acs.jafc.5b04715
7. Becerril Campos AA, Luna Moreno AD, García Gasca MT de J, Ahumada Solórzano SM (2018) Prevención del riesgo metabólico en un modelo in vivo con el consumo de quínoa roja (Chenopodium Berlandieri Spp. Nuttalliae) y hoja de frijol (Phaseolus vulgaris). Revista de la Conferencia Científica Anual sobre Síndrome Metabólico 4:13-16
8. Pichardo-Piña X, Becerril-Campos A, Luna-Moreno A, et al (2017) Parámetros metábolicos y su modulación por dieta obesogénica e inducción de diabetes tipo II con estreptozotocina. Revista de la Conferencia Científica Anual sobre Síndrome Metabólico 4:17–19
9. Percie du Sert N, Ahluwalia A, Alam S, et al (2020) Reporting animal research: Explanation and elaboration for the arrive guidelines 2.0. PLoS Biology 18:e3000411
10. Norma Oficial Mexicana NOM-062-ZOO-1999 (2001) Especificaciones técnicas para la producción, cuidado y uso de los animales de laboratorio. https://www.gob.mx/cms/uploads/attachment/file/203498/NOM-062-ZOO-1999_220801.pdf. Accessed 08 April 2022
11. Ghezzi AC, Cambri LT, Botezelli JD, et al (2012) Metabolic syndrome markers in wistar rats of different ages. Diabetology & Metabolic Syndrome. https://doi.org/10.1186/1758-5996-4-16
12. Novelli ELB, Diniz YS, Galhardi CM, et al (2007) Anthropometrical parameters and markers of obesity in rats. Laboratory Animals. https://doi.org/10.1258/002367707779399518
13. Antunes LC, Elkfury JL, Jornada MN, et al (2016) Validation of HOMA-IR in a model of insulin-resistance induced by a high-fat diet in Wistar rats. Arch. Endocrinol. Metab. https://doi.org/10.1590/2359-3997000000169
14. Kwiterovich PO (2003) Laboratory procedure manual total cholesterol, HDL-cholesterol, triglycerides, and LDL-cholesterol. Baltimore
15. Eggers LF, Schwudke D (2016) Liquid extraction: Folch. In: Encyclopedia of Lipidomics. Springer Netherlands, pp 1–6
16. Folch J, Lees M, Sloane Stanley G (1957) A simple method for the isolation and purification of total lipides from animal tissues. The Journal of Biological Chemistry 226:497–509
17. Shang W, Si X, Zhou Z, et al (2017) Characterization of fecal fat composition and gut derived fecal microbiota in high-fat diet fed rats following intervention with chito-oligosaccharide and resistant starch complexes. Food & Function. https://doi.org/10.1039/C7FO01244F
18. García KE, de Souza TCR, Landín GM, et al (2014) Microbial fermentation patterns, diarrhea incidence, and performance in weaned piglets fed a low protein diet supplemented with probiotics. Food and Nutrition Sciences. https://doi.org/10.4236/FNS.2014.518191

Table S1 Composition of experimental diets consumed for 6 weeks.

|  | Energy  (kcal/ g) | Protein  (%) | Fat  (%) | Carbohydrate  (%) | Fiber  (%) |
| --- | --- | --- | --- | --- | --- |
| Standard diet | 3.4 | 29.8 | 13.4 | 56.7 | 5.3 |
| Standard diet + 10% bean leaves | 3.6 | 29.3 | 13.2 | 57.5 | 5.1 |
| High-fat/high fructose | 4.4 | 20.3 | 39.3 | 40.4 | 3.6 |
| High-fat/high fructose + 10% bean leaves | 4.6 | 19.2 | 37.7 | 43.1 | 3.7 |

**Table S2** Nutritional composition of dry bean leaves

| Determination |  | | |
| --- | --- | --- | --- |
| Moisture (%) | 6.88 | ± | 0.02 |
| Ash (%) | 13.62 | ± | 0.22 |
| Protein (%) | 25.69 | ± | 0.18 |
| Carbohydrates (%) | 49.33 | ± | 0.67 |
| Crude fiber (%) | 9.94 | ± | 0.21 |
| Dietary fiber (%) | 25.85 | ± | 1.37 |
| Neutral detergent fiber (%) | 29.33 | ± | 0.71 |
| Acid detergent fiber (%) | 16.72 | ± | 0.59 |
| Lipids (%) | 1.42 | ± | 0.05 |
| Total phenols (mg GAE/g) | 2.924 | ± | 0.004 |

Values represent means ± SD of triplicate analyses. GAE= Gallic acid equivalent
